# Supplementary material
Source: PubMed Central journal article supplement (PMC4703097)
Supplement: NIHMS729204-supplement-supp_legend.pdf [file NIHMS729204-supplement-supp_legend.pdf]

**Supplementary Figure 1 – Immunohistochemistry of YAP1 expression in various cores of control normal human tissue.** YAP1 staining varies in pattern and distribution among the different tissue cores (50X magnification for all panels).

**Supplementary Figure 2 – Knockdown of YAP1 by siRNA transfection decreases YAP1 mRNA levels in SF1335 meningioma cells.** (A) Quantitative RT-PCR analysis of *YAP1* transcript in meningioma cells (SF1335). (B) Representative diagram of YAP1 siRNA transfection time points followed by wound-healing assay.

**Supplementary Figure 3 – YAP1 protein expression and nuclear localization in meningioma cells.** (A) EGFP fluorescence of meningioma cells transfected with either pEGFP-N2-YAP1 or empty vector (pEGFP-N2). (B) YAP1 immunofluorescence staining using the YAP1 polyclonal antibody to demonstrate the nuclear localization of YAP1 in meningioma cells. Nuclei were counterstained with 4,6'-diamidino-2-phenylindole (DAPI). 100X magnification for all panels.

**Supplementary Figure 4 – YAP1 overexpression promotes *in vitro* cell proliferation of meningioma cells.** Growth curves associated with the expression of YAP1 in non-neoplastic arachnoidal cell (AC1) and in meningioma cells (SF1335, SF4068 and SF6717). Control cells were transfected with empty vector.  $10^4$  cells were

plated in triplicate in 6-well plates and cells were counted daily using trypan blue.

Averages of individual growth data were calculated and plotted against time (hours).

**Supplementary Table 1 – Summary of nuclear YAP1 immunohistochemistry in human meningiomas.**
