# Supplementary material
Source: PubMed Central journal article supplement (PMC4703097)

Figure S1-

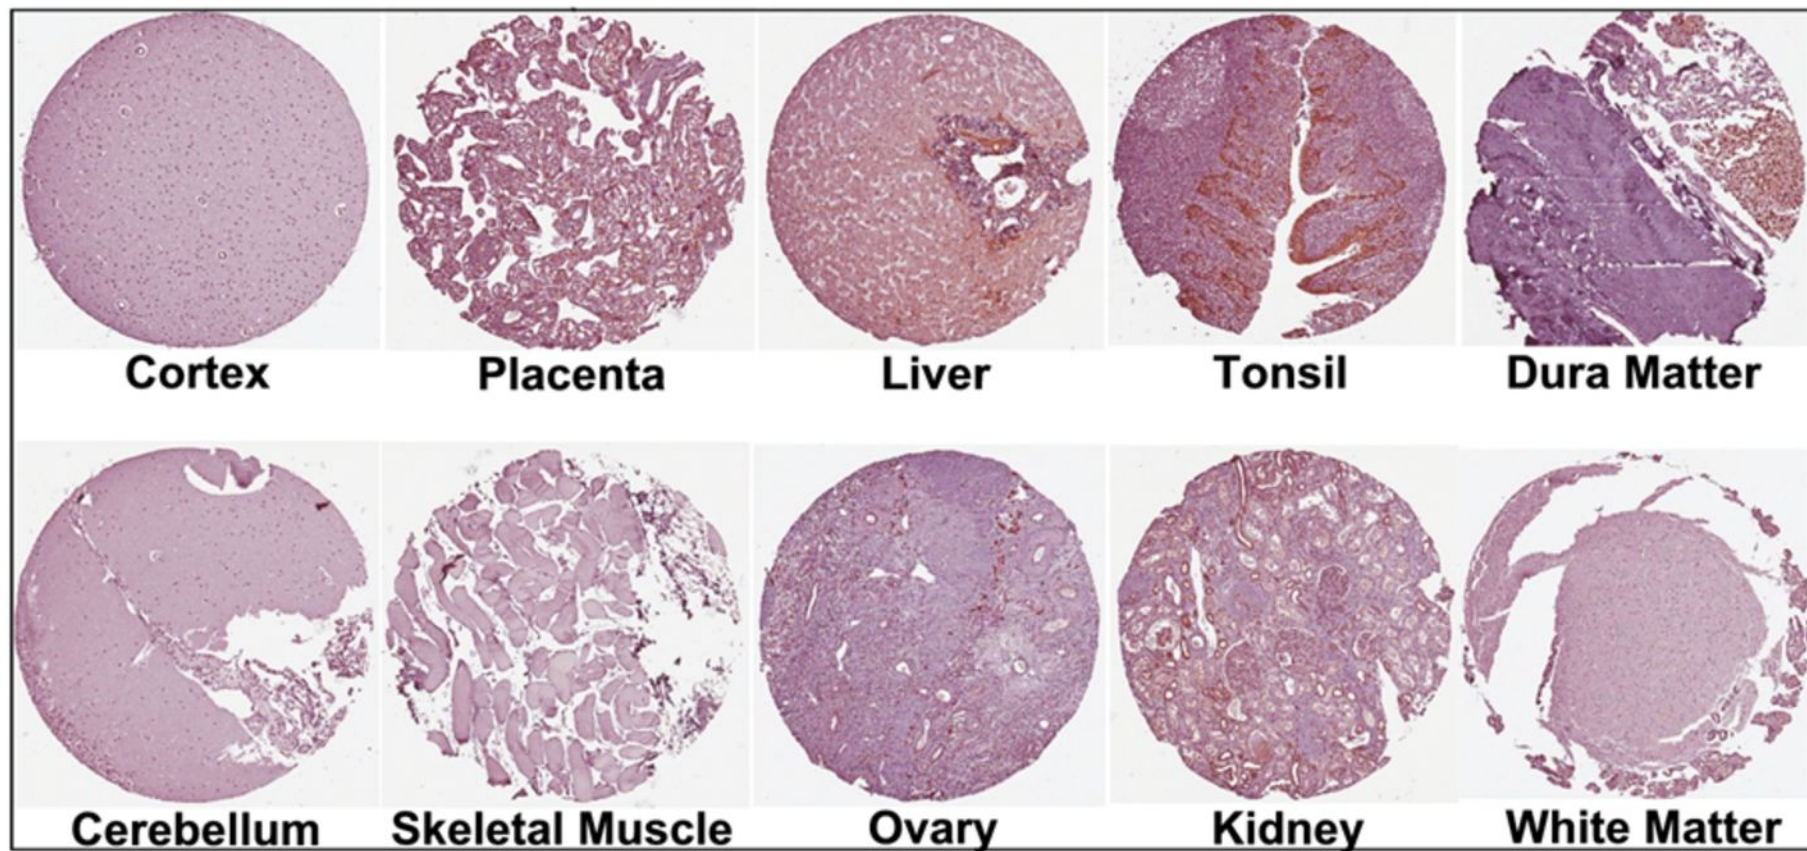

Supplement: NIHMS729204-supplement-supp_fig1.pdf [file NIHMS729204-supplement-supp_fig1.pdf]

Figure S2-

**A**

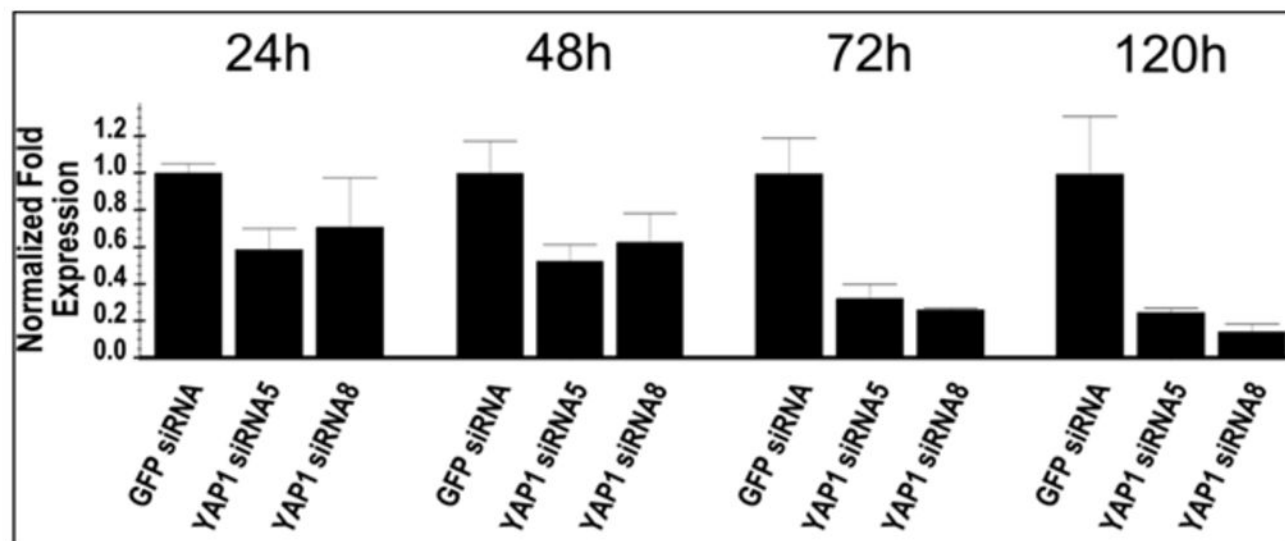

**B**

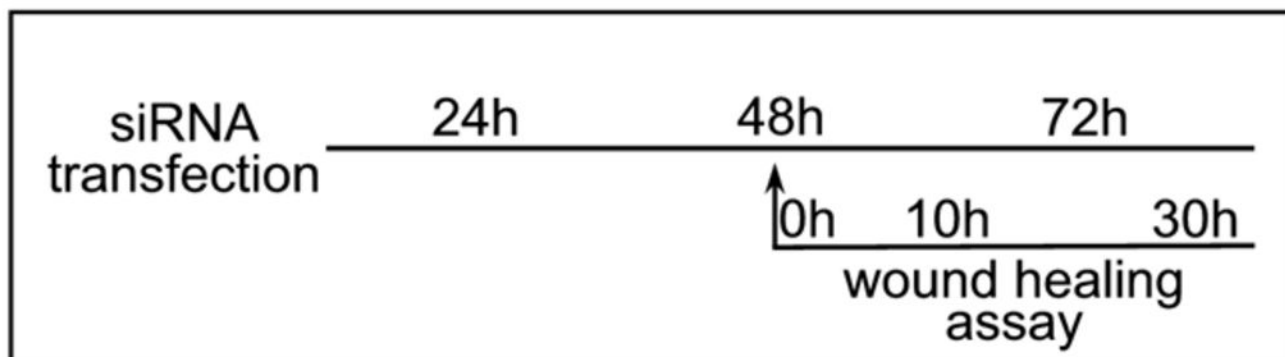

Supplement: NIHMS729204-supplement-supp_fig2.pdf [file NIHMS729204-supplement-supp_fig2.pdf]

Figure S3-

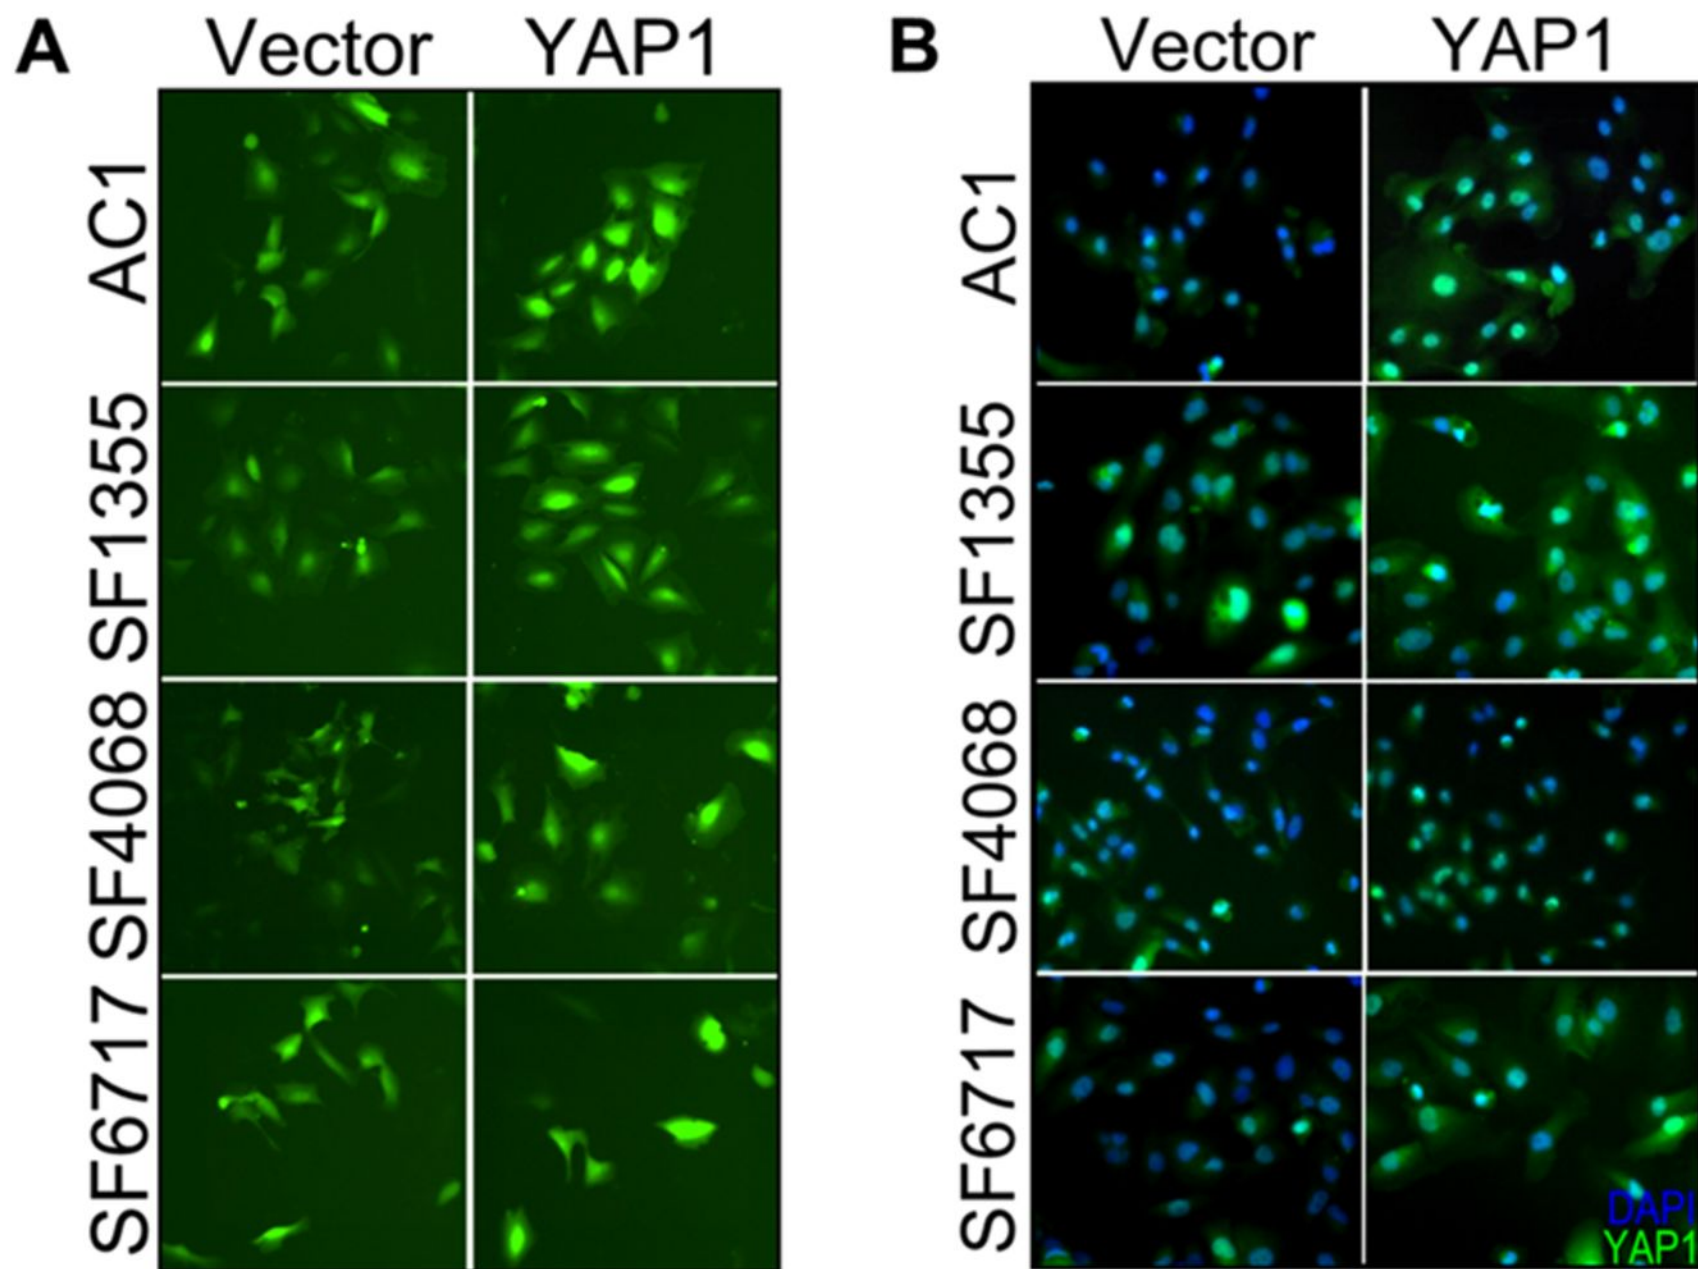

Supplement: NIHMS729204-supplement-supp_fig3.pdf [file NIHMS729204-supplement-supp_fig3.pdf]

Figure S4-

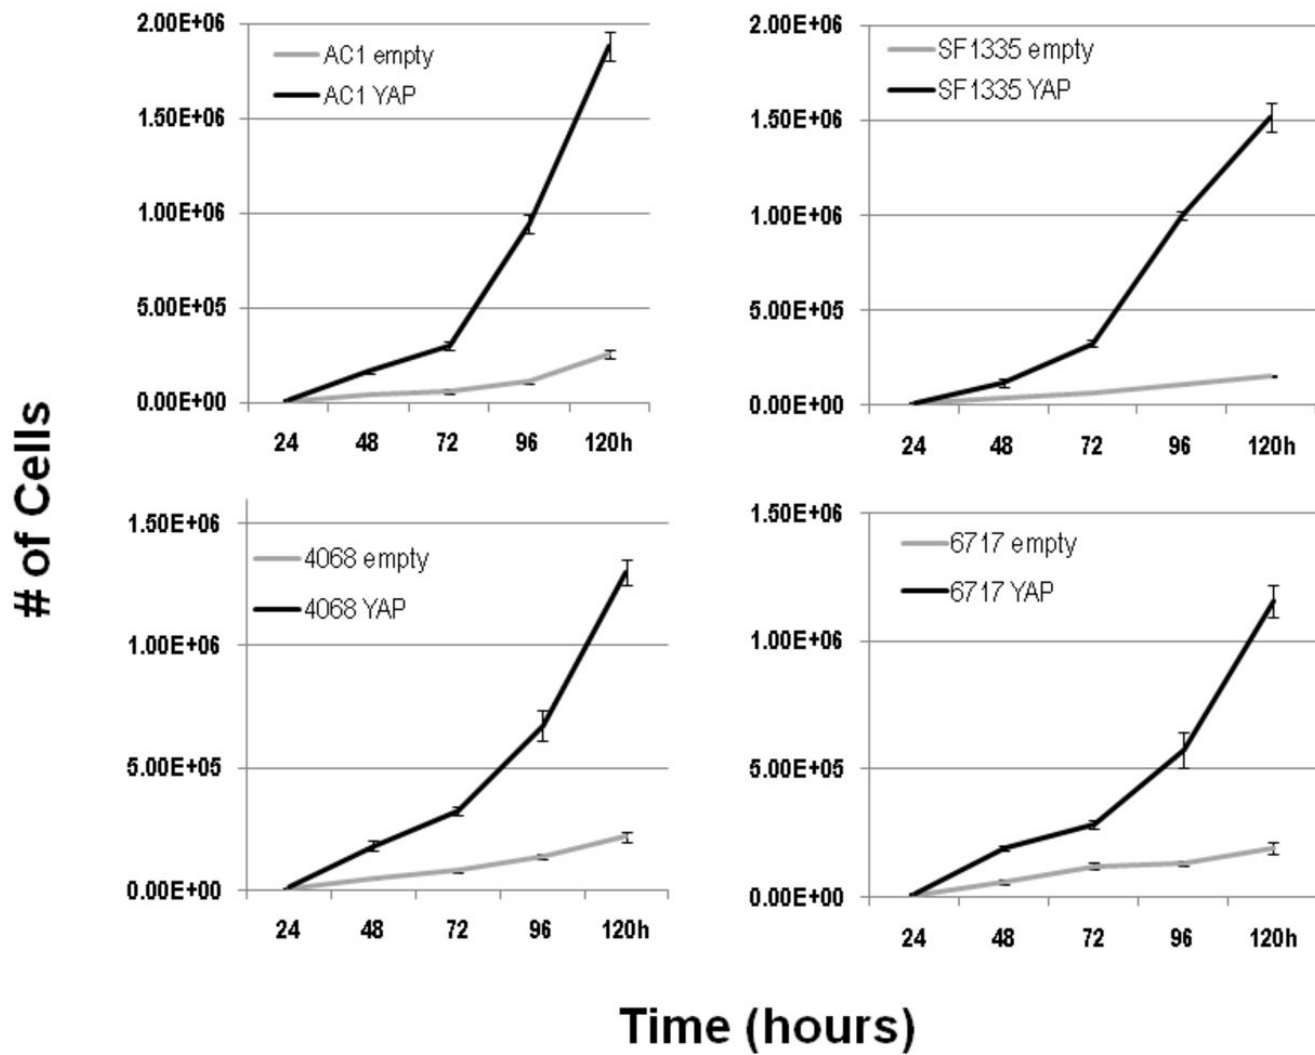

Supplement: NIHMS729204-supplement-suppl_fig4.pdf [file NIHMS729204-supplement-suppl_fig4.pdf]
